# Supplementary material for: Applying a gender lens to biodiversity conservation in High Asia
Source: Frontiers journal article supplement (doi:10.3389/fcosc.2023.1006052), 2023-03-09
Supplement: Table_1.DOCX [file Table_1.DOCX]

**Appendix 1: Gender considerations with respect to rights to and management of pastoral resources in Tost, Gurvantes District, Mongolia.**

| **Pastoral Resources** | **Legal framework** | **Management** |
| --- | --- | --- |
| Pastureland | Private ownership of pastureland is prohibited, but collective possession and use are permitted. | In Tost, a group of neighboring households make collective decisions about pastureland according to vegetation and weather conditions.  Use of pastureland tends to be linked to campsite and corral/shelter possession and ownership rights, which are mainly held by men (in Tost, women are specified in 43 out of 211 (20%) campsite possession certificates). |
| Campsites | Private ownership of campsites is not permitted. Collective and individual possession rights of seasonal campsites are allocated by the District Governor. | Possession certificates usually only list one name (typically the head of household or the senior herder in the camp who tend to be male).  In Tost, women are specified in 43 (20%) out of 211 campsite possession certificates. |
| Water resources | Private ownership of vital water resources is prohibited. Possession and use are managed through various mechanisms. | In Tost, traditional and powered pump wells serve as the main water sources for livestock. They are usually managed collectively by a group of neighboring households.  Some new wells are managed quasi-privately by individual households that hold possession certificates for nearby campsites (usually under a man’s name). |
| Corrals/shelters | Private ownership is permitted. | Ownership of these structures facilitates possession rights to a campsite and use of surrounding pastures.  In Tost, 2 (10%) out of a total of 20 predator-proof corral ownership certificates are under a woman’s name. Data on traditional corral ownership by gender are not available.  Ownership is transferable by sale or inheritance. Women’s property rights are compromised by current inheritance and divorce legislation. |
| Livestock | Private ownership is permitted. | At the Gurvantes district level, out of a total of 5285 livestock registrations, 118 (2%) are under a women’s name |
